# Supplementary material
Source: PubMed Central journal article supplement (PMC535873)
Supplement: plntcell_tpc.104.026930_1.pdf [file plntcell_tpc.104.026930_1.pdf]

**Supplemental Table 1: Microtubule contact times following zippering and catastrophic collisions in YFP-TUA6 expressing cells**

| Microtubule orientation relative to the cell axis | Contact time (sec)        |                          |
|---------------------------------------------------|---------------------------|--------------------------|
|                                                   | Zippering                 | Catastrophic collision   |
| Transverse                                        | 203 ± 96 (19)             | 20 ± 14 (4) <sup>a</sup> |
| Longitudinal                                      | 118 ± 33 (7) <sup>c</sup> | 15 ± 5 (21) <sup>b</sup> |

The data represent the average microtubule contact times ± S.D. (n = microtubules) following microtubule zippering or catastrophic collisions.

<sup>a</sup> Comparison between the contact times for zippering and catastrophically colliding transverse microtubules: p-value ~ 0.0001 (Mann-Whitney test)

<sup>b</sup> Comparison between the contact times for zippering and catastrophically colliding longitudinal microtubules: p-value ~ 0.0001 (Mann-Whitney test)

<sup>c</sup> Comparison between the contact times for zippering transverse and longitudinal microtubules: p-value ~ 0.005 (Mann-Whitney test)
